# Supplementary material
Source: Springer Nature journal article supplement (https://www.springermedizin.de/resource/supplementary/12873_2014_204_MOESM4_ESM.pdf/9431644)
Supplement: MOESM4 [file 9431644]

## INTERVENTION

### Brief Motivational Interview

- Build therapeutic alliance using MI
- Develop action plan for IPV & Alcohol
- Booster phone call re: action plan

### Active Therapeutic Ingredients

1. Therapist empathy and MI spirit
2. Therapist use of MI-consistent methods (Differential reinforcement of "Change Talk")

### Moderating Patient Characteristics

IPV Severity  
Alcohol Dependency  
Other Illicit Drug Use  
Depression  
PTSD  
History of sexual abuse  
Partner's Drinking Habits

## MEDIATORS

### Personal Changes

Increased self-efficacy  
Improved motivation to change  
Self-help actions (to increase safety)

### Social Network/Community Resources

Increased social support  
Engagement with criminal justice system  
Engagement with civil court  
Link to community IPV agencies  
Attendance at Alcoholics Anonymous

### Engagement in Treatment

Substance Abuse Treatment  
(self and/or partner)  
Mental Health Treatment  
Health Care Utilization

## OUTCOMES

Reduction  
in  
frequency  
of IPV

Reduction  
in days of  
heavy  
drinking  
behavior
